# Supplementary material for: Differential responses of termite gut bacterial and fungal community to tropical forest conversion
Source: Research Square preprint supplement (doi:10.21203/rs.3.rs-7803592/v1), 2025-11-03

**Differential responses of termite gut bacterial and fungal community to tropical forest conversion**

Zhizhou Jia1,2, Yuanyuan Meng1*, Wenting Wang2, Jocelyn Behm3, Feng M. Cai1, Sandhya Mishra2, Shangwen Xia2, Shengjie Liu1,2*, Xiaodong Yang2

**Supplementary information**

| Termite species | *Ancistrotermes dimorphus* | | *Odontotermes angustignathus* | | *Odontotermes gravelyi* | | *Odontotermes yunnanensis* | |
| --- | --- | --- | --- | --- | --- | --- | --- | --- |
| Forest type | Natural forest | Rubber plantation | Natural forest | Rubber plantation | Natural forest | Rubber plantation | Natural forest | Rubber plantation |
| Replicate | 8 | 10 | 5 | 3 | 4 | 5 | 7 | 16 |

**Table S1** The replicate for each termite species in natural forests and rubber plantations.

**Table S2** Effects of forest type, termite species and their interactions explain the gut microbiome variation of termite hosts using PERMANOVA with unweighted Uni-Frac.

|  | Bacteria |  | Fungi |  |
| --- | --- | --- | --- | --- |
| Factor | r2 | p | r2 | p |
| Forest type | 0.012 | 0.240 | 0.044 | **<0.001** |
| Termite species | 0.461 | **<0.001** | 0.085 | **<0.001** |
| Forest type * Termite species | 0.038 | 0.180 | 0.060 | 0.072 |

## **Table S3** PERMANOVA using unweighted Uni-Frac on each termite species, testing if forest type explains the gut microbiome variation within each termite species.

|  |  | Bacteria |  | Fungi |  |
| --- | --- | --- | --- | --- | --- |
| Termite species | Factor | r2 | p-value | r2 | p-value |
| *Ancistrotermes dimorphus* | Forest type | 0.062 | 0.433 | 0.089 | **0.023** |
| *Odontotermes angustignathus* | Forest type | 0.224 | **0.033** | 0.195 | 0.18 |
| *Odontotermes gravelyi* | Forest type | 0.166 | 0.079 | 0.205 | **0.009** |
| *Odontotermes yunnanensis* | Forest type | 0.053 | 0.255 | 0.076 | **0.006** |

## **Table S4** PERMANOVA using Bray-Curtis on function prediction of all termite samples, testing if termite species, forest type, and their interaction explain the function variation of the gut bacterial of termite host.

| KO Level | Factor | r2 | p-value |
| --- | --- | --- | --- |
| Level 1 | Termite species | 0.74 | **0.001** |
| Forest type | 0.0009 | 0.72 |
| Termite species * Forest type | 0.007 | 0.68 |
| Level 2 | Termite species | 0.74 | **0.001** |
| Forest type | 0.0003 | 0.89 |
| Termite species * Forest type | 0.01 | 0.60 |
| Level 3 | Termite species | 0.70 | **0.001** |
| Forest type | 0.001 | 0.84 |
| Termite species * Forest type | 0.02 | 0.44 |

## **Table S5** PERMANOVA using Bray-Curtis on function prediction (KO Level 3) of each termite species, testing if forest type explains the function variation of the gut bactiria within each termite species.

| Termite species | Factor | r2 | p-value |
| --- | --- | --- | --- |
| *Ancistrotermes dimorphus* | Forest type | 0.019 | 0.656 |
| *Odontotermes angustignathus* | Forest type | 0.161 | 0.312 |
| *Odontotermes gravelyi* | Forest type | 0.307 | 0.085 |
| *Odontotermes yunnanensis* | Forest type | 0.015 | 0.836 |

## **Table S6** PERMANOVA using Bray-Curtis on fungal guild prediction (excluding Undefined) of all termite samples, testing if termite species, forest type, and their interaction explain the function variation of the gut fungi of termite host.

| Factor | r2 | p-value |
| --- | --- | --- |
| Termite species | 0.152 | **0.001** |
| Forest type | 0.064 | **0.006** |
| Termite species * Forest type | 0.041 | 0.560 |

## **Table S7** PERMANOVA using Bray-Curtis on fungal guild prediction (excluding Undefined Saprotroph) of each termite species, testing if forest type explains the function variation of the gut fungi within each termite species.

| Termite Species | Factor | r2 | p |
| --- | --- | --- | --- |
| *Ancistrotermes dimorphus* | Forest type | 0.123 | 0.059 |
| *Odontotermes angustignathus* | Forest type | 0.149 | 0.518 |
| *Odontotermes gravelyi* | Forest type | 0.350 | **0.012** |
| *Odontotermes yunnanensis* | Forest type | 0.062 | 0.206 |

**Table S8** The relative abundance of each predicted function of gut bacteria community in different termite species in natural forests and rubber plantations.

| KO level 3 | *Odontotermes yunnanensis* | | *Ancistrotermes dimorphus* | | *Odontotermes gravelyi* | | *Odontotermes angustignathus* | |
| --- | --- | --- | --- | --- | --- | --- | --- | --- |
|  | Natural Forest | Rubber Plantation | Natural Forest | Rubber Plantation | Natural Forest | Rubber Plantation | Natural Forest | Rubber Plantation |
| Transporters | 0.0411 | 0.0429 | 0.0497 | 0.048 | 0.0411 | 0.0386 | 0.0392 | 0.0388 |
| General function prediction only | 0.0388 | 0.0388 | 0.0371 | 0.037 | 0.0389 | 0.0368 | 0.0374 | 0.0373 |
| DNA repair and recombination proteins | 0.0306 | 0.0308 | 0.032 | 0.0323 | 0.0309 | 0.0308 | 0.0314 | 0.0317 |
| Ribosome | 0.0293 | 0.0293 | 0.0293 | 0.03 | 0.0297 | 0.0298 | 0.0302 | 0.0307 |
| Purine metabolism | 0.0239 | 0.024 | 0.0242 | 0.0245 | 0.0242 | 0.0238 | 0.0242 | 0.0246 |
| Pyrimidine metabolism | 0.0218 | 0.0218 | 0.0217 | 0.0221 | 0.0217 | 0.0222 | 0.0221 | 0.0224 |
| ABC transporters | 0.0177 | 0.0185 | 0.0258 | 0.0244 | 0.0176 | 0.0163 | 0.0177 | 0.0171 |
| Peptidases | 0.0192 | 0.0192 | 0.0185 | 0.0188 | 0.0194 | 0.0188 | 0.019 | 0.0192 |
| Chromosome | 0.0176 | 0.0177 | 0.0171 | 0.0172 | 0.0174 | 0.0175 | 0.0177 | 0.0176 |
| Amino acid related enzymes | 0.0168 | 0.0168 | 0.017 | 0.0174 | 0.0171 | 0.0168 | 0.0172 | 0.0175 |
| Ribosome Biogenesis | 0.0161 | 0.0163 | 0.0166 | 0.0168 | 0.016 | 0.0159 | 0.0161 | 0.0161 |
| Amino sugar and nucleotide sugar metabolism | 0.0155 | 0.0151 | 0.013 | 0.0131 | 0.0154 | 0.0165 | 0.0153 | 0.0153 |
| Oxidative phosphorylation | 0.0143 | 0.0142 | 0.0136 | 0.0138 | 0.0147 | 0.0135 | 0.014 | 0.0143 |
| DNA replication proteins | 0.014 | 0.0141 | 0.0137 | 0.0138 | 0.014 | 0.014 | 0.0143 | 0.0144 |
| Function unknown | 0.0136 | 0.0137 | 0.014 | 0.0135 | 0.0137 | 0.0125 | 0.013 | 0.0126 |
| Aminoacyl-tRNA biosynthesis | 0.0126 | 0.0126 | 0.0134 | 0.0136 | 0.0128 | 0.0127 | 0.0131 | 0.0132 |
| Carbon fixation pathways in prokaryotes | 0.0124 | 0.0123 | 0.0125 | 0.0127 | 0.0129 | 0.0124 | 0.0129 | 0.0129 |
| Chaperones and folding catalysts | 0.0129 | 0.0127 | 0.0114 | 0.0115 | 0.0128 | 0.0134 | 0.0131 | 0.0131 |
| Two-component system | 0.0117 | 0.0117 | 0.0152 | 0.0144 | 0.0111 | 0.0118 | 0.0116 | 0.0111 |
| Arginine and proline metabolism | 0.0124 | 0.0122 | 0.0117 | 0.0121 | 0.0122 | 0.0125 | 0.0123 | 0.0125 |
| Methane metabolism | 0.0119 | 0.0119 | 0.0121 | 0.0117 | 0.0114 | 0.0123 | 0.0122 | 0.0122 |
| Secretion system | 0.011 | 0.0113 | 0.0131 | 0.013 | 0.0111 | 0.0105 | 0.0112 | 0.011 |
| Alanine, aspartate and glutamate metabolism | 0.0118 | 0.0117 | 0.0109 | 0.0112 | 0.0119 | 0.0116 | 0.0117 | 0.0118 |
| Other ion-coupled transporters | 0.0122 | 0.0123 | 0.0101 | 0.00978 | 0.0118 | 0.012 | 0.0115 | 0.0114 |
| Transcription factors | 0.0116 | 0.012 | 0.0109 | 0.0107 | 0.0112 | 0.0112 | 0.0104 | 0.0102 |
| Homologous recombination | 0.0108 | 0.0107 | 0.0113 | 0.0114 | 0.0108 | 0.0109 | 0.0111 | 0.0112 |
| Starch and sucrose metabolism | 0.0121 | 0.0117 | 0.00827 | 0.00823 | 0.0119 | 0.0128 | 0.0114 | 0.0114 |
| Energy metabolism | 0.0105 | 0.0104 | 0.011 | 0.0108 | 0.0101 | 0.011 | 0.0111 | 0.011 |
| Transcription machinery | 0.0102 | 0.0102 | 0.01 | 0.0102 | 0.0101 | 0.0104 | 0.0103 | 0.0104 |
| Translation proteins | 0.01 | 0.0101 | 0.0101 | 0.0102 | 0.0101 | 0.01 | 0.0101 | 0.0102 |
| Glycine, serine and threonine metabolism | 0.00992 | 0.00986 | 0.00966 | 0.00982 | 0.00989 | 0.0101 | 0.00999 | 0.01 |
| Glycolysis / Gluconeogenesis | 0.0102 | 0.0102 | 0.00893 | 0.009 | 0.0101 | 0.0107 | 0.01 | 0.01 |
| Pyruvate metabolism | 0.00967 | 0.00968 | 0.0103 | 0.0102 | 0.00958 | 0.00989 | 0.0098 | 0.00979 |
| Phenylalanine, tyrosine and tryptophan biosynthesis | 0.00971 | 0.00967 | 0.00938 | 0.00945 | 0.00994 | 0.00991 | 0.00995 | 0.0101 |
| Mismatch repair | 0.0092 | 0.00924 | 0.00958 | 0.00967 | 0.00924 | 0.00926 | 0.00944 | 0.00951 |
| Cysteine and methionine metabolism | 0.00908 | 0.00913 | 0.00902 | 0.00899 | 0.0091 | 0.00904 | 0.00898 | 0.00908 |
| Galactose metabolism | 0.0101 | 0.00996 | 0.00636 | 0.0063 | 0.00975 | 0.0107 | 0.00947 | 0.00968 |
| Bacterial motility proteins | 0.00619 | 0.00628 | 0.0157 | 0.0149 | 0.00575 | 0.00593 | 0.00713 | 0.00624 |
| Peptidoglycan biosynthesis | 0.00851 | 0.0086 | 0.00884 | 0.00903 | 0.00868 | 0.00839 | 0.00859 | 0.00863 |
| Citrate cycle (TCA cycle) | 0.00869 | 0.00855 | 0.00841 | 0.00851 | 0.00896 | 0.00872 | 0.00907 | 0.00906 |
| Pentose phosphate pathway | 0.00848 | 0.00855 | 0.0083 | 0.00847 | 0.00857 | 0.00829 | 0.00834 | 0.00855 |
| Fructose and mannose metabolism | 0.00848 | 0.00837 | 0.00708 | 0.00695 | 0.00858 | 0.00863 | 0.00795 | 0.00791 |
| DNA replication | 0.00781 | 0.00779 | 0.00807 | 0.00815 | 0.00782 | 0.0079 | 0.00806 | 0.00812 |
| Lipid biosynthesis proteins | 0.00767 | 0.00762 | 0.00808 | 0.00823 | 0.00784 | 0.00766 | 0.008 | 0.00811 |
| Lysine biosynthesis | 0.00773 | 0.00779 | 0.0074 | 0.00755 | 0.0078 | 0.00783 | 0.00776 | 0.00789 |
| Membrane and intracellular structural molecules | 0.0083 | 0.00817 | 0.0067 | 0.00662 | 0.00845 | 0.00755 | 0.00786 | 0.00775 |
| Protein export | 0.00769 | 0.00764 | 0.00752 | 0.00767 | 0.00772 | 0.00769 | 0.00782 | 0.00791 |
| Valine, leucine and isoleucine biosynthesis | 0.00727 | 0.00732 | 0.00748 | 0.00767 | 0.00736 | 0.00739 | 0.00753 | 0.00764 |
| Nitrogen metabolism | 0.00748 | 0.00756 | 0.00723 | 0.00709 | 0.00754 | 0.00718 | 0.00719 | 0.00713 |
| Replication, recombination and repair proteins | 0.00706 | 0.00697 | 0.00709 | 0.00694 | 0.00706 | 0.00699 | 0.00703 | 0.00693 |
| Translation factors | 0.00695 | 0.00695 | 0.00681 | 0.00692 | 0.00701 | 0.00702 | 0.00711 | 0.00722 |
| Porphyrin and chlorophyll metabolism | 0.00699 | 0.0071 | 0.00689 | 0.00685 | 0.00729 | 0.00675 | 0.00675 | 0.00679 |
| Protein folding and associated processing | 0.0065 | 0.00651 | 0.00769 | 0.0078 | 0.00651 | 0.00636 | 0.00685 | 0.00673 |
| Pantothenate and CoA biosynthesis | 0.00678 | 0.00686 | 0.00666 | 0.00677 | 0.00701 | 0.00682 | 0.00702 | 0.00708 |
| Bacterial secretion system | 0.0068 | 0.00682 | 0.00667 | 0.00675 | 0.00688 | 0.00664 | 0.00689 | 0.00693 |
| One carbon pool by folate | 0.00684 | 0.00679 | 0.00637 | 0.00645 | 0.00687 | 0.00699 | 0.00697 | 0.00701 |
| Carbon fixation in photosynthetic organisms | 0.00664 | 0.00664 | 0.00657 | 0.00657 | 0.00676 | 0.00676 | 0.00676 | 0.00686 |
| Others | 0.00734 | 0.00733 | 0.00543 | 0.00531 | 0.00722 | 0.00718 | 0.00656 | 0.00657 |
| Histidine metabolism | 0.00663 | 0.00658 | 0.00616 | 0.00628 | 0.00636 | 0.00687 | 0.00663 | 0.00673 |
| Terpenoid backbone biosynthesis | 0.0059 | 0.0059 | 0.00629 | 0.00641 | 0.006 | 0.00606 | 0.00619 | 0.00627 |
| Cell cycle - Caulobacter | 0.00588 | 0.0059 | 0.00626 | 0.00636 | 0.00598 | 0.00594 | 0.00613 | 0.00612 |
| Lipopolysaccharide biosynthesis proteins | 0.00591 | 0.0057 | 0.00531 | 0.00554 | 0.00621 | 0.00586 | 0.00637 | 0.00641 |
| Pores ion channels | 0.00619 | 0.00604 | 0.00493 | 0.00501 | 0.00615 | 0.0059 | 0.00606 | 0.00599 |
| Pentose and glucuronate interconversions | 0.0063 | 0.00599 | 0.00439 | 0.00439 | 0.00607 | 0.00688 | 0.00593 | 0.0059 |
| Glycerophospholipid metabolism | 0.00602 | 0.00587 | 0.00492 | 0.00494 | 0.00585 | 0.00606 | 0.00579 | 0.00585 |
| Streptomycin biosynthesis | 0.00561 | 0.00528 | 0.00419 | 0.00418 | 0.00535 | 0.00647 | 0.00561 | 0.00554 |
| Propanoate metabolism | 0.00482 | 0.00486 | 0.0058 | 0.00593 | 0.00501 | 0.00471 | 0.00495 | 0.00497 |
| Fatty acid biosynthesis | 0.00485 | 0.00491 | 0.00556 | 0.00574 | 0.00508 | 0.00473 | 0.00502 | 0.00519 |
| Glyoxylate and dicarboxylate metabolism | 0.00518 | 0.0052 | 0.005 | 0.00498 | 0.00527 | 0.00505 | 0.00523 | 0.00516 |
| RNA degradation | 0.00508 | 0.00506 | 0.00521 | 0.00528 | 0.00501 | 0.00506 | 0.00514 | 0.00516 |
| Nicotinate and nicotinamide metabolism | 0.00509 | 0.00509 | 0.00482 | 0.00497 | 0.00519 | 0.00526 | 0.00527 | 0.00535 |
| Other glycan degradation | 0.00587 | 0.00558 | 0.00296 | 0.00298 | 0.0056 | 0.00677 | 0.00582 | 0.00585 |
| Butanoate metabolism | 0.00482 | 0.00493 | 0.00496 | 0.00501 | 0.00491 | 0.00485 | 0.00502 | 0.00492 |
| Lipopolysaccharide biosynthesis | 0.00503 | 0.00487 | 0.00399 | 0.00423 | 0.00531 | 0.00503 | 0.00536 | 0.00541 |
| Nucleotide excision repair | 0.00458 | 0.00459 | 0.00465 | 0.00474 | 0.00463 | 0.00462 | 0.0047 | 0.00477 |
| Flagellar assembly | 0.00324 | 0.00329 | 0.00806 | 0.00775 | 0.00292 | 0.00302 | 0.00376 | 0.00323 |
| Folate biosynthesis | 0.00458 | 0.00459 | 0.00413 | 0.00416 | 0.00472 | 0.00451 | 0.00478 | 0.00492 |
| Base excision repair | 0.00432 | 0.00438 | 0.00418 | 0.00431 | 0.0044 | 0.00437 | 0.00435 | 0.00446 |
| Sphingolipid metabolism | 0.00489 | 0.00461 | 0.00206 | 0.00204 | 0.00451 | 0.00575 | 0.0047 | 0.00474 |
| Bacterial chemotaxis | 0.00275 | 0.00282 | 0.00732 | 0.00683 | 0.00246 | 0.00267 | 0.00305 | 0.00264 |
| Drug metabolism - other enzymes | 0.00405 | 0.00397 | 0.0034 | 0.00352 | 0.00391 | 0.00453 | 0.00412 | 0.0042 |
| Glycerolipid metabolism | 0.00413 | 0.0041 | 0.00292 | 0.0029 | 0.00391 | 0.00413 | 0.00369 | 0.00374 |
| Valine, leucine and isoleucine degradation | 0.00359 | 0.00353 | 0.00389 | 0.00407 | 0.0037 | 0.00346 | 0.00367 | 0.0037 |
| Glycosyltransferases | 0.00365 | 0.00362 | 0.00363 | 0.00373 | 0.00386 | 0.00351 | 0.00373 | 0.00375 |
| Signal transduction mechanisms | 0.0034 | 0.00347 | 0.0042 | 0.00412 | 0.00333 | 0.00321 | 0.00334 | 0.00325 |
| Cyanoamino acid metabolism | 0.00396 | 0.00383 | 0.00244 | 0.00258 | 0.00392 | 0.00415 | 0.00369 | 0.00372 |
| Selenocompound metabolism | 0.00321 | 0.00321 | 0.00378 | 0.00379 | 0.00314 | 0.00319 | 0.00328 | 0.00325 |
| Thiamine metabolism | 0.00333 | 0.00355 | 0.00315 | 0.00322 | 0.00341 | 0.00307 | 0.0032 | 0.00331 |
| Cytoskeleton proteins | 0.00297 | 0.00299 | 0.00314 | 0.00313 | 0.00286 | 0.00309 | 0.00303 | 0.00299 |
| Photosynthesis proteins | 0.00272 | 0.00268 | 0.00368 | 0.00366 | 0.00329 | 0.00242 | 0.00294 | 0.00295 |
| Prenyltransferases | 0.00299 | 0.00299 | 0.00296 | 0.00301 | 0.00305 | 0.00297 | 0.00307 | 0.00315 |
| Photosynthesis | 0.0027 | 0.00266 | 0.00365 | 0.00364 | 0.00327 | 0.0024 | 0.00293 | 0.00294 |
| Sulfur metabolism | 0.00289 | 0.00283 | 0.00293 | 0.00285 | 0.00272 | 0.00305 | 0.00288 | 0.00281 |
| Lysosome | 0.00348 | 0.00314 | 0.00134 | 0.00132 | 0.00305 | 0.00476 | 0.00352 | 0.00344 |
| Polyketide sugar unit biosynthesis | 0.00295 | 0.00274 | 0.00241 | 0.00244 | 0.0028 | 0.00355 | 0.00303 | 0.00296 |
| Vitamin B6 metabolism | 0.00274 | 0.0027 | 0.00255 | 0.00256 | 0.00276 | 0.00271 | 0.00272 | 0.00272 |
| C5-Branched dibasic acid metabolism | 0.00255 | 0.00256 | 0.00288 | 0.00292 | 0.0026 | 0.00255 | 0.00263 | 0.00265 |
| Ubiquinone and other terpenoid-quinone biosynthesis | 0.00281 | 0.00285 | 0.00226 | 0.00228 | 0.00286 | 0.00242 | 0.00271 | 0.00284 |
| Sporulation | 0.00253 | 0.00293 | 0.00265 | 0.00261 | 0.00219 | 0.00249 | 0.0019 | 0.00194 |
| Other transporters | 0.00255 | 0.00265 | 0.00254 | 0.00255 | 0.00259 | 0.00236 | 0.00241 | 0.0024 |
| Glycosphingolipid biosynthesis - globo series | 0.00299 | 0.00278 | 0.00121 | 0.00116 | 0.00261 | 0.00371 | 0.00294 | 0.00292 |
| Fatty acid metabolism | 0.00228 | 0.00224 | 0.00273 | 0.00275 | 0.00228 | 0.00232 | 0.00239 | 0.00232 |
| Glutathione metabolism | 0.00238 | 0.00236 | 0.0025 | 0.00263 | 0.00256 | 0.00205 | 0.00231 | 0.00235 |
| Cell motility and secretion | 0.00221 | 0.00216 | 0.00264 | 0.00264 | 0.00223 | 0.00221 | 0.00241 | 0.00233 |
| Protein kinases | 0.00231 | 0.00239 | 0.00242 | 0.00239 | 0.00222 | 0.00212 | 0.00215 | 0.00214 |
| Restriction enzyme | 0.00222 | 0.00225 | 0.00233 | 0.00222 | 0.00224 | 0.0024 | 0.00254 | 0.00257 |
| beta-Alanine metabolism | 0.0022 | 0.00222 | 0.00183 | 0.00188 | 0.00225 | 0.00221 | 0.00217 | 0.00223 |
| Phenylpropanoid biosynthesis | 0.00248 | 0.00234 | 0.00122 | 0.00127 | 0.00245 | 0.00266 | 0.00228 | 0.00231 |
| Riboflavin metabolism | 0.00215 | 0.00215 | 0.00179 | 0.00184 | 0.00221 | 0.00226 | 0.00222 | 0.00229 |
| Inorganic ion transport and metabolism | 0.00216 | 0.00215 | 0.00188 | 0.00173 | 0.00218 | 0.00215 | 0.00198 | 0.00198 |
| Phenylalanine metabolism | 0.00183 | 0.00187 | 0.00223 | 0.00218 | 0.00194 | 0.00167 | 0.00185 | 0.00182 |
| Glycosaminoglycan degradation | 0.00236 | 0.00212 | 0.000856 | 0.000815 | 0.00196 | 0.00337 | 0.00243 | 0.00236 |
| Peroxisome | 0.00179 | 0.00174 | 0.00222 | 0.00225 | 0.00181 | 0.00183 | 0.00199 | 0.00194 |
| PPAR signaling pathway | 0.00186 | 0.0018 | 0.0021 | 0.00213 | 0.0018 | 0.00191 | 0.00198 | 0.00195 |
| D-Glutamine and D-glutamate metabolism | 0.00189 | 0.00188 | 0.00178 | 0.00179 | 0.00184 | 0.00196 | 0.00193 | 0.00195 |
| Tyrosine metabolism | 0.00189 | 0.00189 | 0.00184 | 0.00187 | 0.00191 | 0.00185 | 0.00178 | 0.00176 |
| RNA polymerase | 0.0018 | 0.00183 | 0.00192 | 0.00193 | 0.00185 | 0.00182 | 0.00187 | 0.00192 |
| Sulfur relay system | 0.00161 | 0.00163 | 0.00242 | 0.00237 | 0.00166 | 0.00155 | 0.00176 | 0.0018 |
| Novobiocin biosynthesis | 0.00174 | 0.00175 | 0.00164 | 0.00161 | 0.00177 | 0.00171 | 0.00175 | 0.00179 |
| Phosphotransferase system (PTS) | 0.00182 | 0.00231 | 0.00142 | 0.00129 | 0.00229 | 0.00107 | 0.000856 | 0.000873 |
| Tryptophan metabolism | 0.0015 | 0.00149 | 0.00165 | 0.00172 | 0.0015 | 0.00147 | 0.00151 | 0.00152 |
| Adipocytokine signaling pathway | 0.00145 | 0.00139 | 0.00168 | 0.00171 | 0.00142 | 0.00151 | 0.0016 | 0.00156 |
| Lysine degradation | 0.00139 | 0.00133 | 0.00153 | 0.00161 | 0.00139 | 0.00139 | 0.00148 | 0.00147 |
| Glycosphingolipid biosynthesis - ganglio series | 0.00165 | 0.00154 | 0.000697 | 0.000671 | 0.00143 | 0.0022 | 0.00175 | 0.00173 |
| Inositol phosphate metabolism | 0.00149 | 0.00143 | 0.00122 | 0.00116 | 0.00146 | 0.00153 | 0.00149 | 0.00148 |
| Biotin metabolism | 0.00128 | 0.0013 | 0.00153 | 0.00152 | 0.00134 | 0.00121 | 0.00138 | 0.00135 |
| Toluene degradation | 0.00142 | 0.00139 | 0.00114 | 0.0012 | 0.00147 | 0.00141 | 0.00147 | 0.00149 |
| Tropane, piperidine and pyridine alkaloid biosynthesis | 0.00132 | 0.00132 | 0.0013 | 0.00132 | 0.00139 | 0.00126 | 0.00134 | 0.00136 |
| Taurine and hypotaurine metabolism | 0.0013 | 0.0013 | 0.00131 | 0.00134 | 0.00133 | 0.00125 | 0.00127 | 0.00129 |
| Biosynthesis of unsaturated fatty acids | 0.00119 | 0.00121 | 0.00142 | 0.00149 | 0.00122 | 0.00112 | 0.00123 | 0.00126 |
| Bacterial toxins | 0.00132 | 0.00132 | 0.00104 | 0.00105 | 0.00131 | 0.00153 | 0.00134 | 0.00137 |
| Plant-pathogen interaction | 0.00115 | 0.00115 | 0.00154 | 0.00154 | 0.00109 | 0.00114 | 0.00118 | 0.00114 |
| Benzoate degradation | 0.0012 | 0.00125 | 0.00127 | 0.00119 | 0.0012 | 0.00107 | 0.00118 | 0.00111 |
| Ascorbate and aldarate metabolism | 0.00136 | 0.00133 | 0.000906 | 0.000914 | 0.0014 | 0.0013 | 0.00107 | 0.00105 |
| Carbohydrate metabolism | 0.00127 | 0.00131 | 0.000978 | 0.000914 | 0.00132 | 0.00124 | 0.00114 | 0.00108 |
| D-Alanine metabolism | 0.00115 | 0.00115 | 0.00118 | 0.0012 | 0.00115 | 0.00115 | 0.00117 | 0.00117 |
| Butirosin and neomycin biosynthesis | 0.00134 | 0.00126 | 0.00071 | 0.000722 | 0.00129 | 0.00161 | 0.00129 | 0.00131 |
| Phosphatidylinositol signaling system | 0.0012 | 0.00119 | 0.00105 | 0.00108 | 0.00123 | 0.00114 | 0.00117 | 0.00119 |
| Lipoic acid metabolism | 0.00115 | 0.00112 | 0.00114 | 0.00117 | 0.00119 | 0.00112 | 0.0012 | 0.00121 |
| Cell division | 0.00107 | 0.00104 | 0.00114 | 0.00112 | 0.0011 | 0.00106 | 0.00114 | 0.00112 |
| Metabolism of cofactors and vitamins | 0.00104 | 0.00101 | 0.00115 | 0.0011 | 0.00105 | 0.000887 | 0.00103 | 0.000984 |
| Lipid metabolism | 0.000929 | 0.000946 | 0.00123 | 0.00125 | 0.000973 | 0.000919 | 0.000996 | 0.00098 |
| Amino acid metabolism | 0.00108 | 0.00107 | 0.000865 | 0.000895 | 0.00109 | 0.000981 | 0.00102 | 0.00101 |
| RNA transport | 0.000994 | 0.000994 | 0.000952 | 0.000944 | 0.000959 | 0.000992 | 0.000981 | 0.000976 |
| Glutamatergic synapse | 0.000994 | 0.000987 | 0.000921 | 0.000914 | 0.000934 | 0.00107 | 0.00101 | 0.00102 |
| Chloroalkane and chloroalkene degradation | 0.000892 | 0.000875 | 0.000938 | 0.000863 | 0.000842 | 0.0011 | 0.000792 | 0.000732 |
| Biosynthesis of ansamycins | 0.000776 | 0.000798 | 0.00102 | 0.00101 | 0.000822 | 0.000747 | 0.000789 | 0.000812 |
| Nucleotide metabolism | 0.000929 | 0.000963 | 0.000627 | 0.000619 | 0.000878 | 0.000891 | 0.000868 | 0.000875 |
| Cellular antigens | 0.00089 | 0.000824 | 0.000665 | 0.000734 | 0.000906 | 0.000923 | 0.00094 | 0.000953 |
| Aminobenzoate degradation | 0.0008 | 0.000764 | 0.000935 | 0.000876 | 0.000813 | 0.000833 | 0.000815 | 0.000844 |
| Tetracycline biosynthesis | 0.000593 | 0.000641 | 0.00119 | 0.00126 | 0.000622 | 0.000569 | 0.000639 | 0.00066 |
| Isoquinoline alkaloid biosynthesis | 0.000759 | 0.000751 | 0.000794 | 0.000816 | 0.00083 | 0.000716 | 0.000784 | 0.000807 |
| Zeatin biosynthesis | 0.000739 | 0.000727 | 0.000742 | 0.000759 | 0.000792 | 0.000704 | 0.000754 | 0.000763 |
| Insulin signaling pathway | 0.000726 | 0.000712 | 0.000797 | 0.000772 | 0.000783 | 0.000552 | 0.000608 | 0.000609 |
| Biosynthesis of vancomycin group antibiotics | 0.000743 | 0.000697 | 0.000595 | 0.000623 | 0.0007 | 0.000882 | 0.00076 | 0.00074 |
| Naphthalene degradation | 0.000689 | 0.000645 | 0.00068 | 0.000661 | 0.000618 | 0.000843 | 0.000705 | 0.000675 |
| Glycan biosynthesis and metabolism | 0.000598 | 0.000579 | 0.000749 | 0.000756 | 0.000581 | 0.000562 | 0.00064 | 0.000571 |
| Protein processing in endoplasmic reticulum | 0.000549 | 0.000526 | 0.000713 | 0.000707 | 0.000577 | 0.000563 | 0.000621 | 0.000612 |
| Ribosome biogenesis in eukaryotes | 0.000561 | 0.000563 | 0.000573 | 0.000587 | 0.000571 | 0.000566 | 0.000581 | 0.000591 |
| N-Glycan biosynthesis | 0.000616 | 0.000579 | 0.000458 | 0.000503 | 0.000679 | 0.000568 | 0.000615 | 0.000655 |
| Biosynthesis and biodegradation of secondary metabolites | 0.000633 | 0.000627 | 0.000363 | 0.00034 | 0.00056 | 0.00065 | 0.000603 | 0.00058 |
| Protein digestion and absorption | 0.000588 | 0.000556 | 0.000437 | 0.000454 | 0.000604 | 0.000556 | 0.000583 | 0.000581 |
| MAPK signaling pathway - yeast | 0.000627 | 0.000644 | 0.00034 | 0.000355 | 0.000618 | 0.000549 | 0.000529 | 0.000537 |
| Steroid hormone biosynthesis | 0.000568 | 0.000517 | 0.000185 | 0.000158 | 0.000426 | 0.000847 | 0.000621 | 0.000602 |
| Geraniol degradation | 0.000399 | 0.00038 | 0.000549 | 0.000532 | 0.000376 | 0.00041 | 0.000448 | 0.000431 |
| Nitrotoluene degradation | 0.000334 | 0.000379 | 0.000576 | 0.000476 | 0.000389 | 0.000266 | 0.000441 | 0.000346 |
| Arachidonic acid metabolism | 0.000406 | 0.000407 | 0.000412 | 0.00043 | 0.000463 | 0.000307 | 0.000353 | 0.000345 |
| Limonene and pinene degradation | 0.000399 | 0.000392 | 0.00038 | 0.000415 | 0.000368 | 0.000482 | 0.000361 | 0.000379 |
| Phosphonate and phosphinate metabolism | 0.000433 | 0.000423 | 0.000431 | 0.000394 | 0.000416 | 0.000282 | 0.000352 | 0.000321 |
| Primary bile acid biosynthesis | 0.000478 | 0.00048 | 0.000119 | 9.19E-05 | 0.000448 | 0.000433 | 0.000365 | 0.000378 |
| Secondary bile acid biosynthesis | 0.000478 | 0.000479 | 0.000118 | 9.06E-05 | 0.000447 | 0.000432 | 0.000364 | 0.000377 |
| alpha-Linolenic acid metabolism | 0.000499 | 0.000457 | 0.000156 | 0.000133 | 0.000488 | 0.000251 | 0.000311 | 0.000323 |
| Proximal tubule bicarbonate reclamation | 0.000321 | 0.000296 | 0.000341 | 0.000317 | 0.000264 | 0.000368 | 0.000344 | 0.00035 |
| Flavone and flavonol biosynthesis | 0.00039 | 0.000325 | 7.89E-05 | 7.43E-05 | 0.000296 | 0.00066 | 0.000401 | 0.000384 |
| Synthesis and degradation of ketone bodies | 0.000228 | 0.000252 | 0.000414 | 0.000424 | 0.000263 | 0.000187 | 0.000279 | 0.000258 |
| Biosynthesis of siderophore group nonribosomal peptides | 0.000361 | 0.000359 | 0.000201 | 0.000188 | 0.000392 | 0.000214 | 0.000262 | 0.000261 |
| Ion channels | 0.00037 | 0.000365 | 0.000102 | 9.15E-05 | 0.000359 | 0.000322 | 0.000263 | 0.000274 |
| Apoptosis | 0.000246 | 0.00024 | 0.000169 | 0.000122 | 0.000206 | 0.000335 | 0.000273 | 0.000268 |
| Carbohydrate digestion and absorption | 0.000327 | 0.000283 | 7.68E-05 | 6.93E-05 | 0.000287 | 0.000263 | 0.000203 | 0.000181 |
| Drug metabolism - cytochrome P450 | 0.000233 | 0.000202 | 0.000203 | 0.000181 | 0.000191 | 0.000255 | 0.000187 | 0.000161 |
| Bisphenol degradation | 0.000228 | 0.000218 | 0.000162 | 0.000177 | 0.000205 | 0.000262 | 0.000184 | 0.00016 |
| Metabolism of xenobiotics by cytochrome P450 | 0.000229 | 0.000201 | 0.000198 | 0.000176 | 0.00019 | 0.000249 | 0.000183 | 0.000158 |
| Linoleic acid metabolism | 0.000215 | 0.00021 | 0.000156 | 0.000181 | 0.000193 | 0.00026 | 0.000177 | 0.000153 |
| Germination | 0.000192 | 0.00022 | 0.000212 | 0.00022 | 0.00011 | 0.000184 | 0.000134 | 0.000126 |
| Meiosis - yeast | 0.000144 | 0.000113 | 0.000321 | 0.000283 | 0.000121 | 9.19E-05 | 0.000147 | 0.000119 |
| Electron transfer carriers | 0.000194 | 0.000182 | 0.000196 | 0.00017 | 0.000178 | 0.000116 | 0.000148 | 0.000103 |
| Ethylbenzene degradation | 0.000161 | 0.000147 | 0.000155 | 0.000169 | 0.000132 | 0.000204 | 0.000161 | 0.000146 |
| Chlorocyclohexane and chlorobenzene degradation | 0.000166 | 0.000152 | 0.000149 | 0.000125 | 0.000148 | 0.00022 | 0.000169 | 0.000161 |
| Retinol metabolism | 0.000175 | 0.00015 | 0.000115 | 9.87E-05 | 0.000154 | 0.000242 | 0.000151 | 0.000133 |
| Dioxin degradation | 0.000129 | 0.000168 | 0.000204 | 0.000146 | 0.000138 | 9.13E-05 | 9.15E-05 | 7.06E-05 |
| Xylene degradation | 0.000113 | 0.000135 | 0.00023 | 0.000157 | 0.00012 | 7.98E-05 | 8.45E-05 | 5.79E-05 |
| Ubiquitin system | 7.54E-05 | 5.82E-05 | 0.000223 | 0.000181 | 8.64E-05 | 9.01E-05 | 0.000105 | 0.00011 |
| Styrene degradation | 6.83E-05 | 6.69E-05 | 0.000209 | 0.000189 | 7.79E-05 | 5.18E-05 | 7.19E-05 | 6.62E-05 |
| Caprolactam degradation | 0.000138 | 0.000127 | 7.71E-05 | 6.89E-05 | 0.000134 | 6.03E-05 | 9.40E-05 | 8.80E-05 |
| Basal transcription factors | 2.21E-05 | 1.70E-05 | 0.000143 | 0.00014 | 1.31E-05 | 2.78E-05 | 3.93E-05 | 3.21E-05 |
| beta-Lactam resistance | 4.94E-05 | 6.71E-05 | 5.18E-05 | 4.37E-05 | 3.76E-05 | 4.90E-05 | 3.79E-05 | 4.08E-05 |
| Non-homologous end-joining | 5.00E-05 | 5.67E-05 | 4.71E-05 | 5.01E-05 | 4.50E-05 | 4.85E-05 | 3.47E-05 | 4.21E-05 |
| Fluorobenzoate degradation | 4.18E-05 | 2.72E-05 | 8.07E-05 | 8.99E-05 | 3.27E-05 | 2.33E-05 | 3.90E-05 | 3.85E-05 |
| Carotenoid biosynthesis | 2.42E-05 | 2.26E-05 | 9.48E-05 | 8.54E-05 | 3.59E-05 | 3.15E-05 | 4.57E-05 | 4.82E-05 |
| Penicillin and cephalosporin biosynthesis | 2.15E-05 | 2.29E-05 | 6.78E-05 | 8.47E-05 | 1.47E-05 | 2.16E-05 | 2.97E-05 | 2.46E-05 |
| Mineral absorption | 2.84E-05 | 3.96E-05 | 4.24E-05 | 3.74E-05 | 4.02E-05 | 3.79E-05 | 2.97E-05 | 2.54E-05 |
| D-Arginine and D-ornithine metabolism | 2.16E-05 | 2.80E-05 | 5.45E-05 | 5.98E-05 | 2.19E-05 | 1.82E-05 | 1.70E-05 | 1.36E-05 |
| Atrazine degradation | 2.35E-05 | 1.93E-05 | 2.66E-05 | 2.03E-05 | 1.85E-05 | 1.68E-05 | 1.31E-05 | 1.29E-05 |
| Proteasome | 7.58E-06 | 1.19E-05 | 5.55E-06 | 6.31E-06 | 2.42E-05 | 1.90E-05 | 2.30E-05 | 4.39E-05 |
| Transcription related proteins | 2.36E-05 | 2.85E-05 | 1.11E-06 | 9.27E-07 | 1.85E-05 | 1.81E-06 | 6.20E-06 | 1.09E-06 |
| Flavonoid biosynthesis | 6.44E-06 | 5.72E-06 | 3.61E-05 | 3.02E-05 | 6.92E-06 | 4.60E-06 | 8.70E-06 | 2.44E-06 |
| Ether lipid metabolism | 6.94E-06 | 7.55E-06 | 1.44E-05 | 1.52E-05 | 1.52E-05 | 1.26E-05 | 1.10E-05 | 1.56E-05 |
| RIG-I-like receptor signaling pathway | 1.17E-05 | 2.00E-05 | 1.82E-06 | 1.68E-06 | 1.96E-05 | 8.15E-06 | 6.19E-06 | 8.85E-06 |
| Betalain biosynthesis | 3.43E-06 | 2.02E-06 | 2.13E-05 | 2.81E-05 | 1.26E-06 | 5.34E-06 | 5.28E-06 | 2.33E-06 |
| Indole alkaloid biosynthesis | 3.43E-06 | 2.02E-06 | 2.04E-05 | 2.72E-05 | 1.26E-06 | 5.34E-06 | 5.28E-06 | 2.33E-06 |
| Polycyclic aromatic hydrocarbon degradation | 1.36E-05 | 1.04E-05 | 7.93E-06 | 3.63E-06 | 1.21E-05 | 3.74E-06 | 8.40E-06 | 9.78E-06 |
| NOD-like receptor signaling pathway | 2.19E-06 | 7.73E-06 | 3.10E-08 | 9.85E-08 | 1.55E-05 | 1.43E-05 | 1.11E-05 | 1.02E-05 |
| Stilbenoid, diarylheptanoid and gingerol biosynthesis | 4.45E-06 | 5.69E-06 | 6.53E-06 | 2.77E-06 | 5.02E-06 | 3.61E-06 | 4.23E-06 | 7.79E-06 |
| Steroid biosynthesis | 1.02E-06 | 1.61E-06 | 3.45E-06 | 1.45E-06 | 1.72E-05 | 2.37E-06 | 6.64E-06 | 1.63E-05 |
| Fatty acid elongation in mitochondria | 5.96E-08 | 1.76E-08 | 1.08E-06 | 6.29E-06 | 3.45E-08 | 5.79E-07 | 5.75E-07 | 3.85E-07 |
| Various types of N-glycan biosynthesis | 5.76E-07 | 6.36E-07 | 1.86E-06 | 9.24E-07 | 1.42E-06 | 2.59E-06 | 4.94E-07 | 3.97E-07 |
| Melanogenesis | 0 | 0 | 8.78E-07 | 9.61E-07 | 0 | 0 | 0 | 0 |
| Vasopressin-regulated water reabsorption | 1.49E-07 | 5.49E-08 | 3.10E-07 | 1.89E-07 | 8.63E-08 | 9.18E-08 | 1.55E-07 | 0 |
| Aldosterone-regulated sodium reabsorption | 0 | 0 | 3.82E-07 | 2.13E-07 | 5.18E-08 | 0 | 5.90E-08 | 0 |
| Bile secretion | 0 | 0 | 3.82E-07 | 2.13E-07 | 5.18E-08 | 0 | 5.90E-08 | 0 |
| Cardiac muscle contraction | 0 | 0 | 3.82E-07 | 2.13E-07 | 5.18E-08 | 0 | 5.90E-08 | 0 |
| Endocrine and other factor-regulated calcium reabsorption | 0 | 0 | 3.82E-07 | 2.13E-07 | 5.18E-08 | 0 | 5.90E-08 | 0 |
| Gastric acid secretion | 0 | 0 | 3.82E-07 | 2.13E-07 | 5.18E-08 | 0 | 5.90E-08 | 0 |
| Pancreatic secretion | 0 | 0 | 3.82E-07 | 2.13E-07 | 5.18E-08 | 0 | 5.90E-08 | 0 |
| Salivary secretion | 0 | 0 | 3.82E-07 | 2.13E-07 | 5.18E-08 | 0 | 5.90E-08 | 0 |
| Isoflavonoid biosynthesis | 4.96E-07 | 8.12E-08 | 0 | 8.21E-09 | 0 | 0 | 0 | 0 |
| mRNA surveillance pathway | 0 | 1.76E-08 | 0 | 0 | 5.70E-09 | 0 | 1.96E-08 | 1.44E-07 |
| Biosynthesis of type II polyketide products | 0 | 0 | 0 | 0 | 0 | 0 | 1.11E-08 | 0 |

## **Table S9** The relative abundance of each function of gut fungal community in different termite species in natural forests and rubber plantations.

| Functional guild | *Ancistrotermes dimorphus* | | *Odontotermes angustignathus* | | *Odontotermes gravelyi* | | *Odontotermes yunnanensis* | |
| --- | --- | --- | --- | --- | --- | --- | --- | --- |
| Natural forest | Rubber plantation | Natural forest | Rubber plantation | Natural forest | Rubber plantation | Natural forest | Rubber plantation |
| Animal Pathogen | 0.012240016 | 0.006159378 | 0.026991286 | 0 | 0.065790773 | 0.10086712 | 0.012514988 | 0.020076378 |
| Animal Pathogen-Endophyte-Epiphyte-Fungal Parasite-Plant Pathogen-Wood Saprotroph | 0.057007129 | 0.213578059 | 0.052616337 | 0.146198328 | 0.093089359 | 0.25236957 | 0.034524602 | 0.216446553 |
| Animal Pathogen-Epiphyte | 0 | 0 | 0.007268322 | 0 | 0 | 0 | 0 | 0.000125401 |
| Bryophyte Parasite-Litter Saprotroph-Wood Saprotroph | 0 | 0 | 0 | 0 | 0.010957519 | 0.000847458 | 0 | 0.008712149 |
| Dung Saprotroph-Plant Saprotroph | 0 | 0 | 0 | 0 | 0.005396527 | 0 | 0 | 0 |
| Dung Saprotroph-Plant Saprotroph-Wood Saprotroph | 0.039782328 | 0 | 0.046634963 | 0 | 0.029039933 | 0 | 0.023440468 | 0.003009845 |
| Dung Saprotroph-Soil Saprotroph | 0 | 0.000947867 | 0 | 0 | 0.000505732 | 0 | 4.1869E-05 | 0 |
| Ectomycorrhizal | 0.00024975 | 0.006648199 | 0 | 0 | 0.000469263 | 0 | 0.001687136 | 0.003924987 |
| Ectomycorrhizal-Fungal Parasite | 0 | 0 | 0 | 0.029049296 | 0 | 0 | 0 | 0.000451165 |
| Endophyte | 0 | 0.003912659 | 0.008988764 | 0.028169014 | 0.022561756 | 0.05968276 | 0.00664267 | 0.000934065 |
| Endophyte-Plant Pathogen | 0.003080706 | 0.003191489 | 0.008050121 | 0.048780488 | 0.024824585 | 0.000906618 | 0.050761296 | 0.001999147 |
| Endophyte-Plant Pathogen-Wood Saprotroph | 0.003522834 | 0.002150538 | 0 | 0.023767606 | 0.022382338 | 0 | 0.004584374 | 0.036292681 |
| Epiphyte | 0.000777605 | 0 | 0.002201835 | 0.04665493 | 0.007028685 | 0.001271186 | 0.001254543 | 0.005490424 |
| Ericoid Mycorrhizal | 0.00184583 | 0.010571109 | 0.003573336 | 0.002640845 | 0.00271861 | 0 | 0.00487089 | 0.000677083 |
| Fungal Parasite | 0 | 0 | 0 | 0.018292683 | 0.005731625 | 0.002185792 | 0.002151867 | 0.01027531 |
| Fungal Parasite-Plant Pathogen-Plant Saprotroph | 0.000621891 | 0 | 0.001343195 | 0 | 0.002214062 | 0 | 0.001640718 | 0.000461914 |
| Lichen Parasite-Lichenized | 0.012950938 | 0.002702703 | 0 | 0.002640845 | 0.000999001 | 0.002077922 | 9.91604E-05 | 0.007202669 |
| Lichenized | 0 | 0 | 0.011353712 | 0.064260563 | 0 | 0.003921569 | 0.000305 | 0.000341297 |
| Lichenized-Wood Saprotroph | 0 | 0.013597862 | 0.003420185 | 0 | 0 | 0 | 0.000165267 | 0.025420235 |
| Litter Saprotroph-Soil Saprotroph-Wood Saprotroph | 0 | 0.006524793 | 0.004770642 | 0 | 0.003540121 | 0.000423729 | 0.015726274 | 0.004328056 |
| Plant Pathogen | 0.368973078 | 0.330555172 | 0.353237835 | 0.325246193 | 0.417342207 | 0.204015247 | 0.455097556 | 0.341270789 |
| Plant Pathogen-Plant Saprotroph | 0.000899281 | 0 | 0 | 0 | 0.013486513 | 0 | 0 | 0 |
| Plant Pathogen-Wood Saprotroph | 0.002525253 | 0.023912299 | 0.018762156 | 0 | 0.019608274 | 0.015686275 | 0.007096811 | 0.007142136 |
| Plant Saprotroph-Wood Saprotroph | 0.001166407 | 0.041535284 | 0.002422774 | 0 | 0.005691634 | 0.007238346 | 0.004397294 | 0.028856225 |
| Plant pathogen | 0 | 0 | 0 | 0 | 0 | 0 | 0 | 0.015185201 |
| Soil Saprotroph | 0 | 0.016590653 | 0 | 0 | 0 | 0.017647059 | 0 | 0.000825577 |
| Wood Saprotroph | 0.494356954 | 0.317421937 | 0.448364538 | 0.26429921 | 0.246621483 | 0.330859349 | 0.372997217 | 0.260550713 |

## **Fig. S1** ﻿Map showing the location of four typical natural forests (NF) and two rubber plantations (RP) located in Xishuangbanna, Southwest China. Photos on the right panel show the appearance of NF and RP, and on the bottom show four most abundant termite species.

**Fig. S2** Effects of forest types and termite species on diversity of termite bacteria (a, c) and fungi (b, d). NF = natural forest, RP = rubber plantation. *p < 0.05, **p < 0.01, ***p < 0.001, ns = not significant


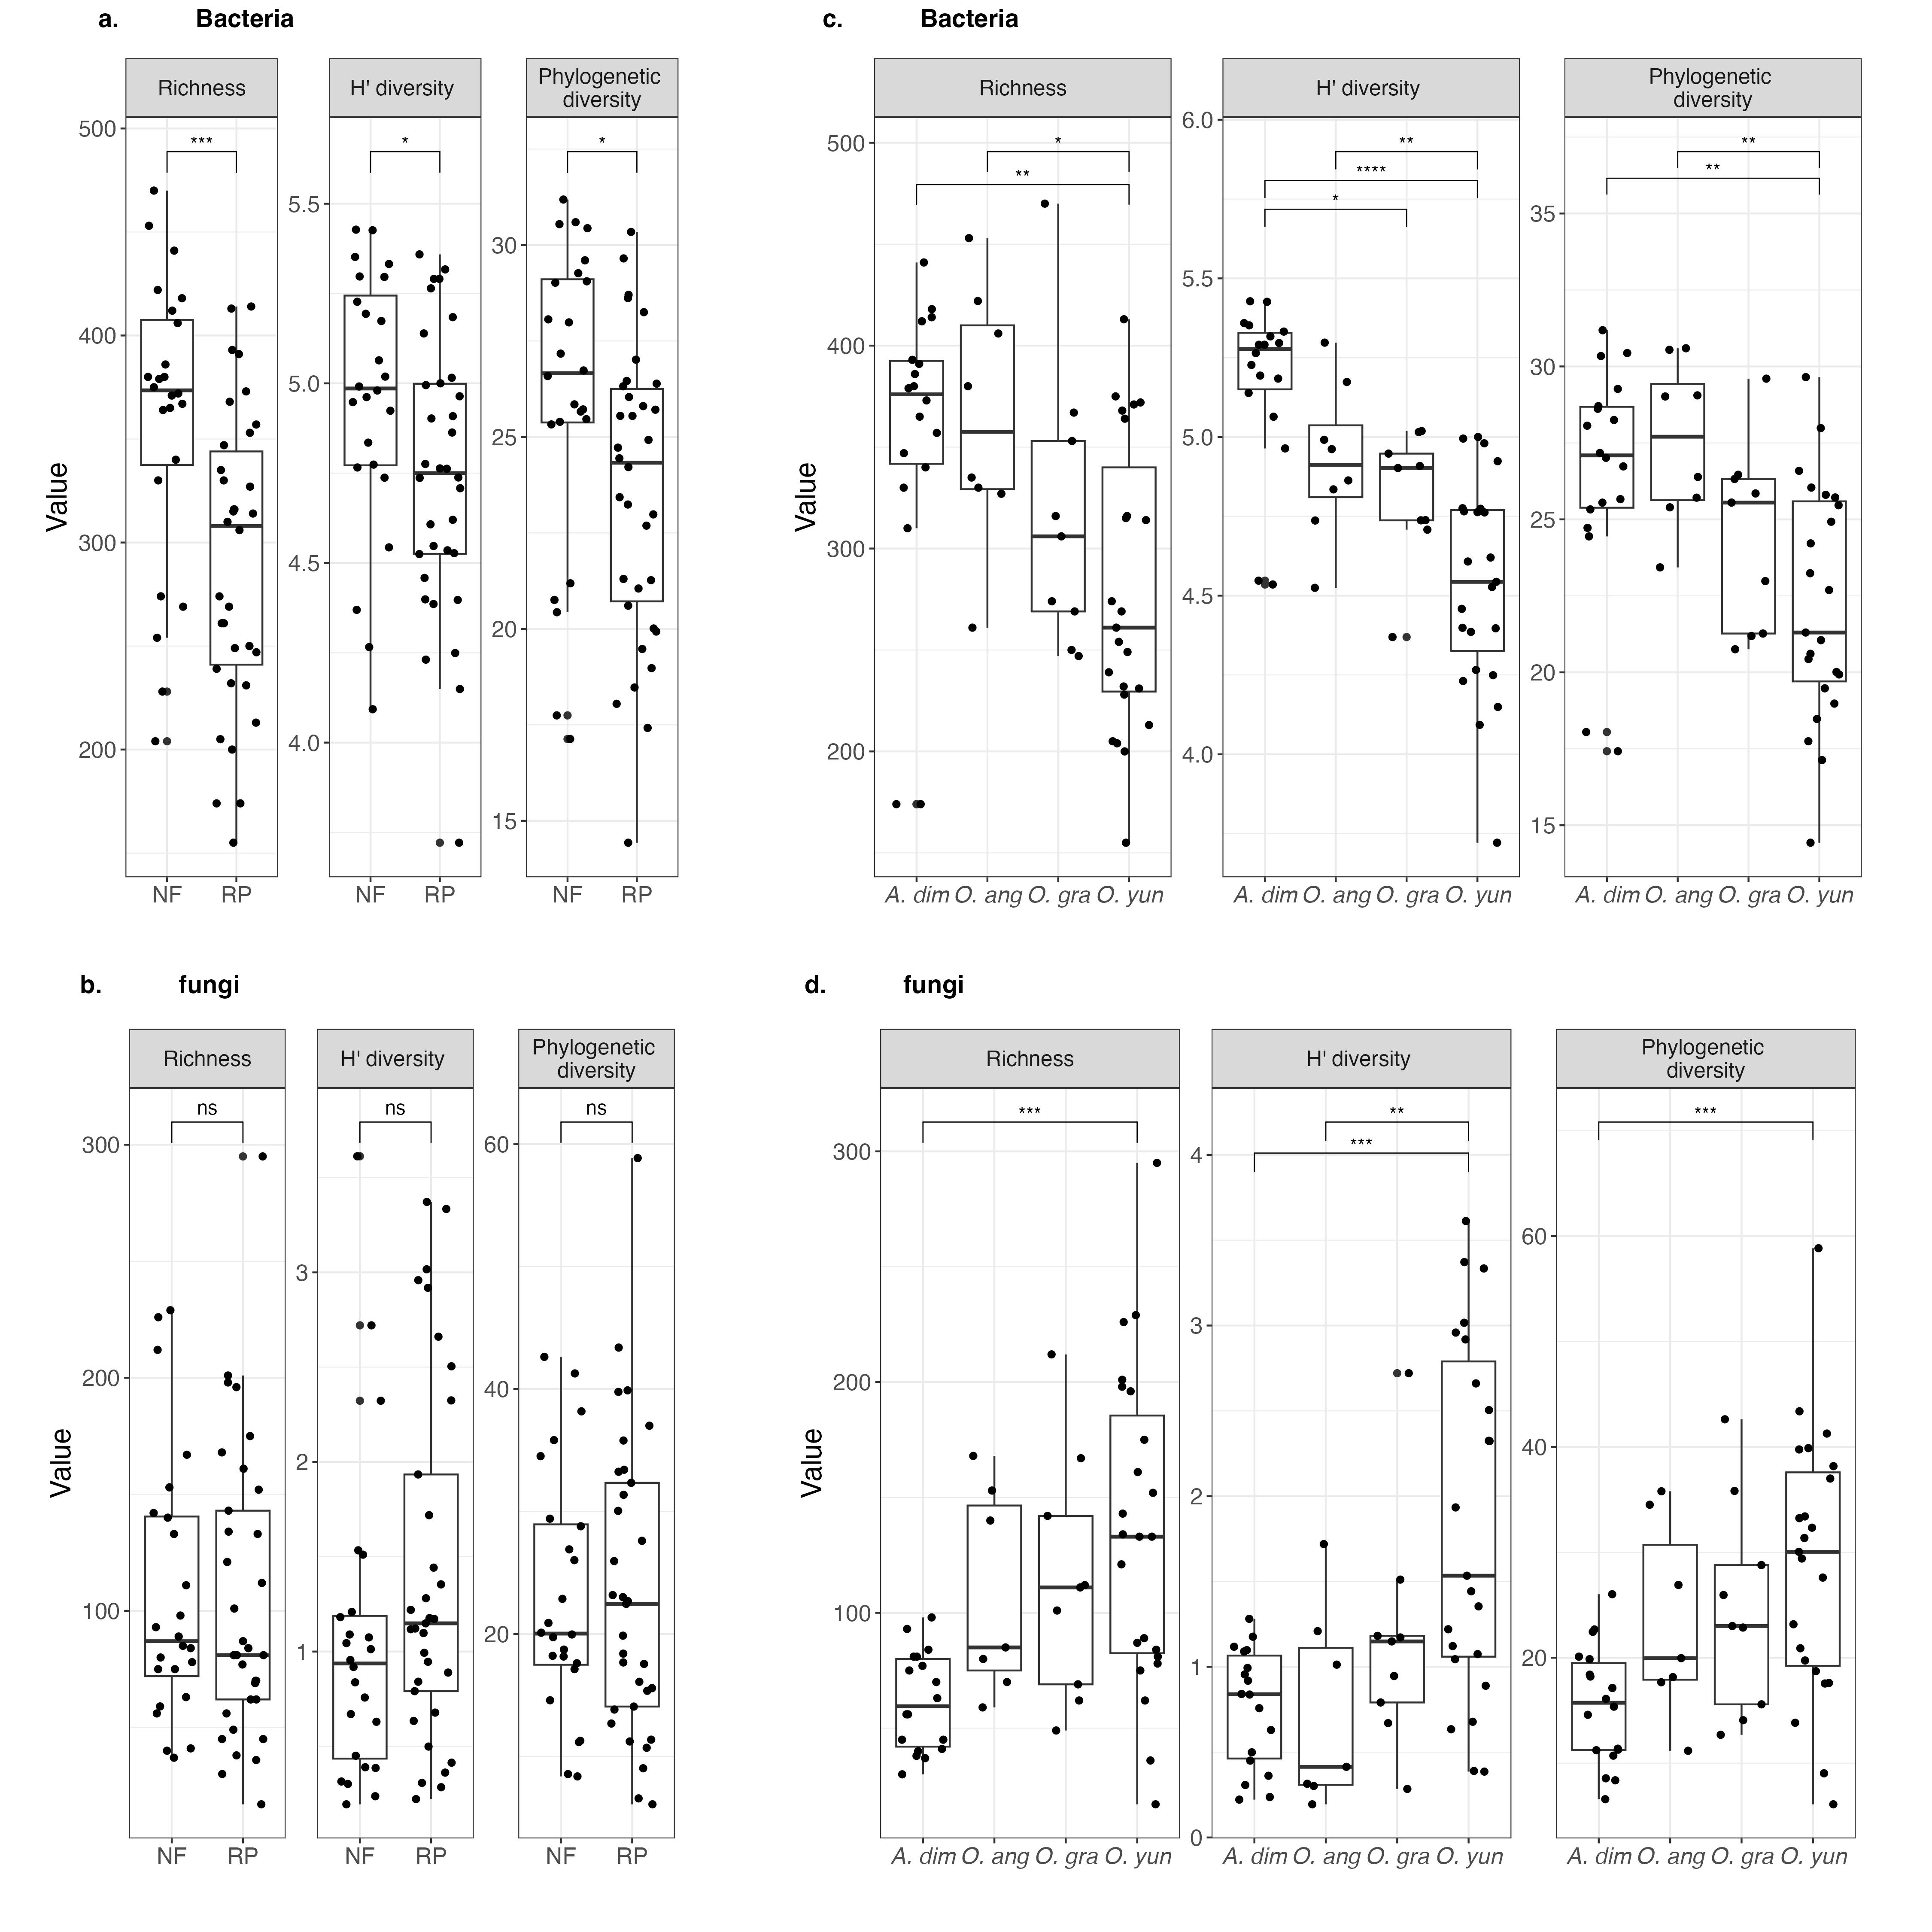


## **Fig. S3** The alpha diversity of bacteria (a, c, e) and fungi (b, d, f) in four termite species in natural forest (NF) and rubber plantation (RP). *p < 0.05, ns = not significant **
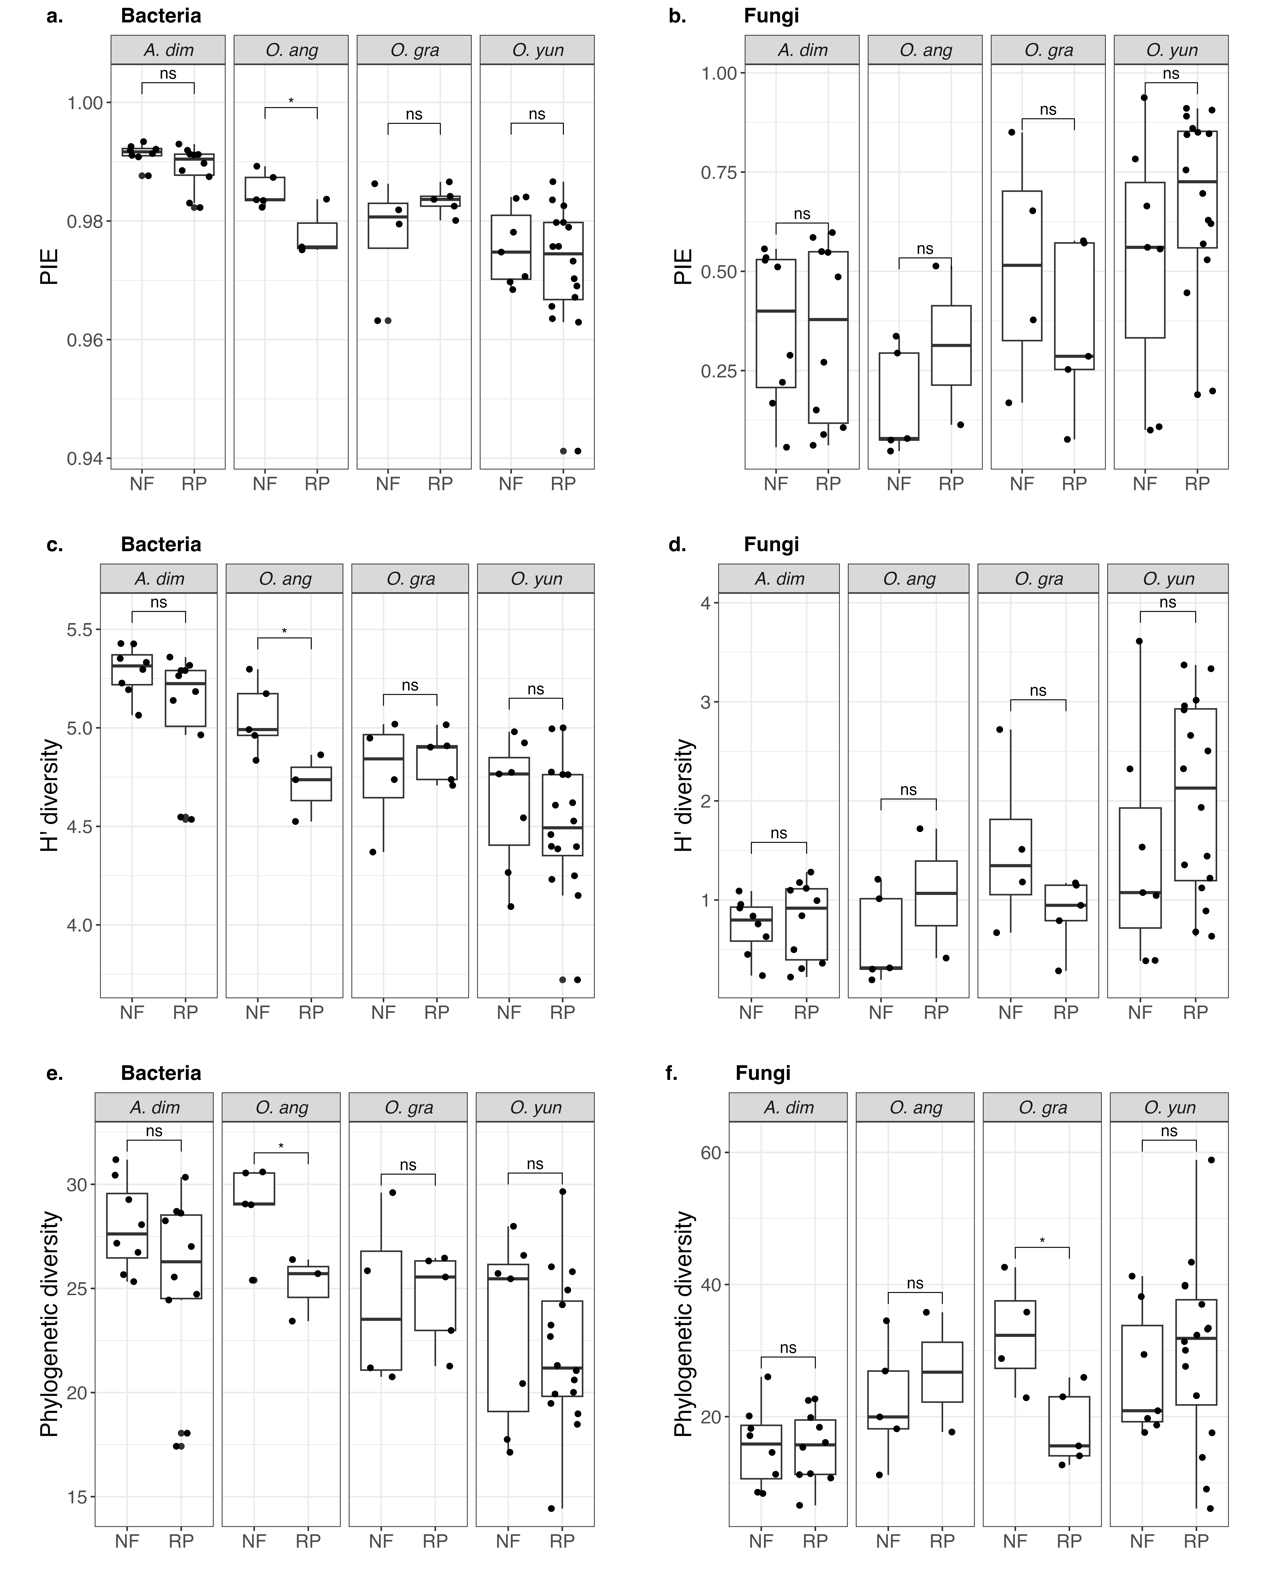
**

## **Fig. S4** Family-level gut bacterial composition of different termite species in natural forest and rubber plantation.


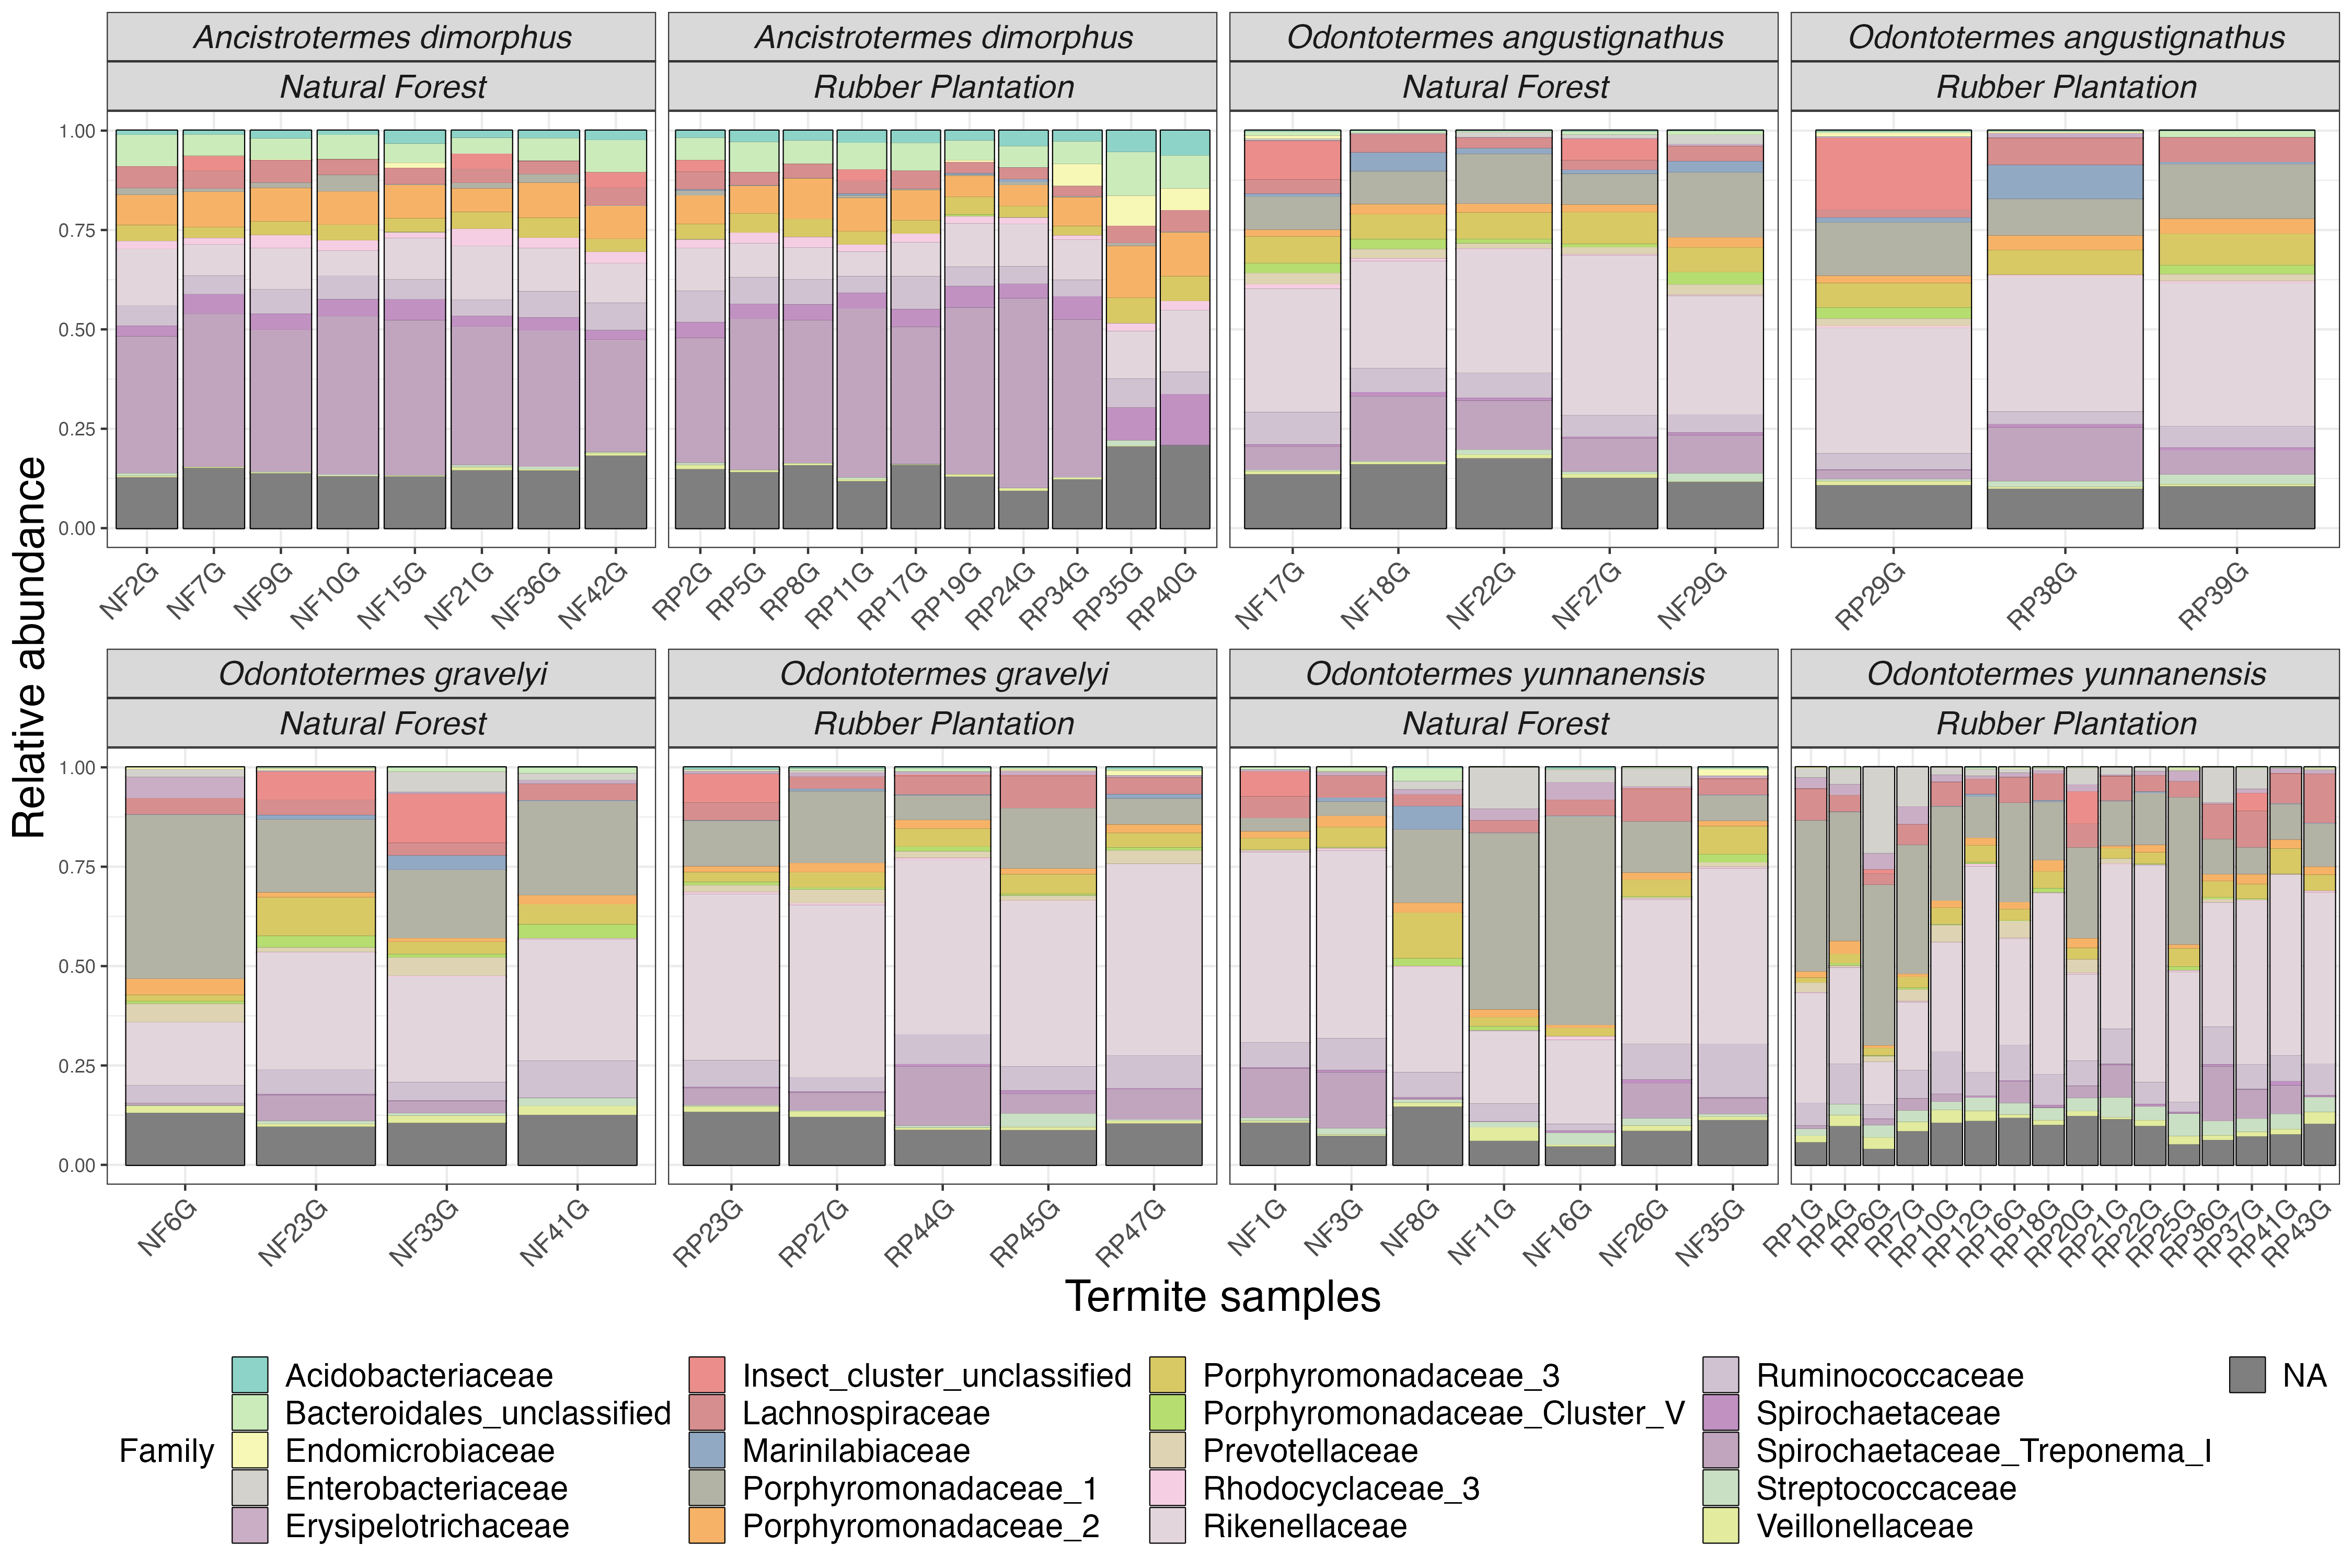


**Fig. S5** Family-level gut fungal composition of different termite species in natural forest and rubber plantation.
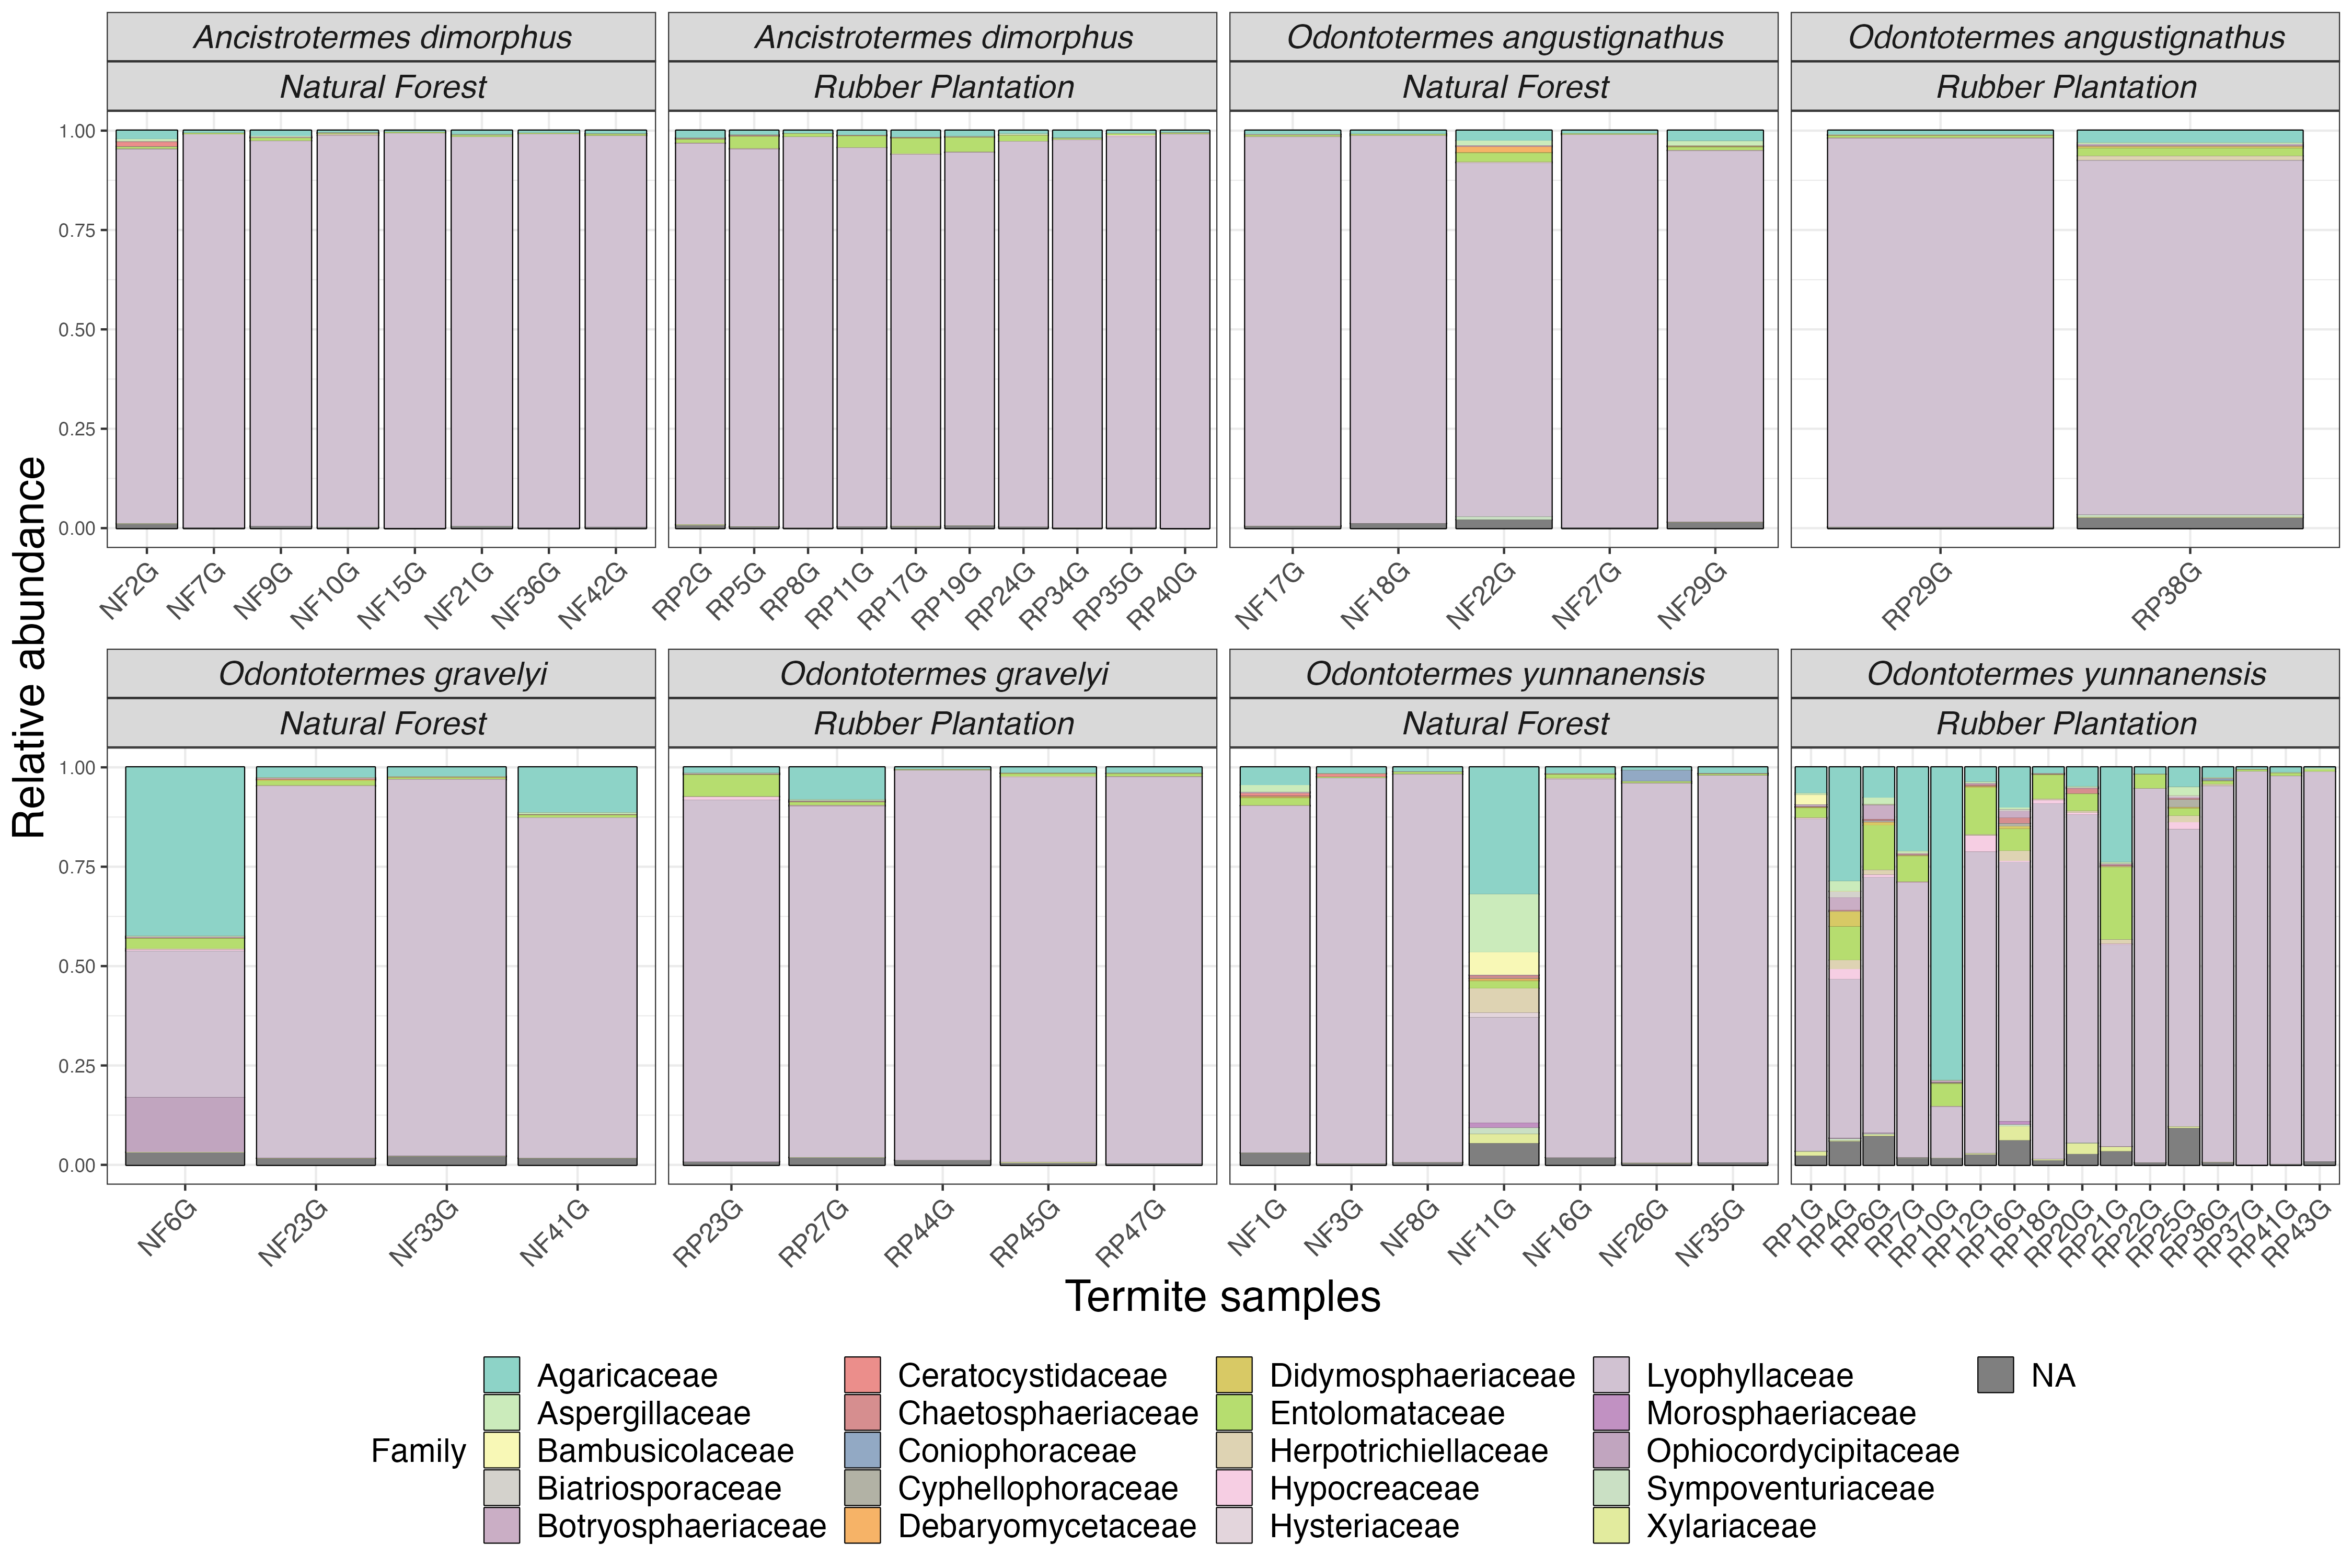

Supplement: Supplementary file 1 [file 00db55608a5b8216f73c3d1d.docx]
